# Supplementary material
Source: PubMed Central journal article supplement (PMC2722894)
Supplement: ddn190_1.pdf [file ddn190_1.pdf]

## Supplemental Information

### **Somatic microindels in human cancer: The insertions are highly error-prone and derive from nearby but not adjacent sense and antisense templates**

**The subset of 1-M and N-1 microindels do not obviously fit the alternative model of a base substitution with an adjacent deletion or insertion.**

About half the microindels have one base inserted (1-M microindels). These mutations might be described by an alternative model hypothesizing a one base substitution with an adjacent deletion, but are not consistent with the signatures of either single-base substitutions or microdeletions within the *TP53* gene. The 31 *TP53* somatic microindels with one bp inserted (1-M microindels, SI Table 6A) or the 6 *TP53* somatic microindels with one bp deleted (N-1 microindels, SI Table 6B) might be hypothesized to result from a pure microdeletion or pure microinsertion, respectively, and a single base substitution at either end. However, the observed substitutions by this alternative model do not reflect the hotspots, and in general, the spectrum of substitutions in the IARC database, providing evidence against this hypothesis. SI Table 6 shows the hypothesized substitutions in this alternative model of 1-M and N-1 microindels. When the hypothesized substitutions are categorized by their observed frequency in the IARC database, there are dramatically fewer “hot” substitutions than expected ( $p < 0.000000005$  and  $p = 0.01$  for 1-M and N-1 microindels, respectively; SI Table 7). For example, 35% of the substitutions in the IARC database are substitutions that are reported more than 100 times, so if 1-M microindels were actually due to a pure microdeletion and single base substitution, then the hypothesized substitutions for about 11 of the 31 1-M microindels would be expected to be among those that appear more than 100 times in the IARC database, yet none are. In addition, the deletions postulated by this model do not have the signature of pure microdeletions (1-4) and the distribution of deletion sizes in 1-M microindels is not different from that in the other microindel types that cannot derive from this alternative mechanism ( $p = 0.3$ , data not shown).

On the other hand, when the hypothesized substitutions in 1-M microindels are categorized by their observed frequency in the IARC database, the distribution does not quite fit the expected distribution for randomized *TP53* substitutions ( $p=0.02$  compared to the substitutions in the IARC database uniformly distributed over the set of unique substitutions). This difference may reflect non-randomness in the location of microindels (see discussion of recurroids) or the involvement of base substitutions having a mutation signature dramatically different from the general signature of base substitutions within *TP53*. We conclude that the alternative model for 1-M and N-1 microindels is possible for some of the events, but the signatures for the hypothesized base substitutions, deletions and insertions differ from the expected signatures of these types of mutations.

### **Nonhomologous end joining is a potential mechanism for microindels.**

One mechanism considered for the origin of microindels is nonhomologous end joining (NHEJ), a common pathway for the repair of DNA double strand breaks (DSB) in multicellular eukaryotes (5). NHEJ involves modification of the broken ends to create a compatibility that facilitates rejoining. Before modification, the DNA ends created by DSBs are generally incompatible, but if microhomology of 1 to 4 bp occurs at the ends, end joining is facilitated (6,7). While not essential, any microhomology biases the joining for a preferred alignment. NHEJ is characterized by a diversity of DSB sequence ends, alignments and end-processing. An *in vitro* system used to study NHEJ showed evidence of at least four principal mechanisms of NHEJ, likely accomplished by different protein complexes and leading to a diversity of outcomes (7). NHEJ produces primarily small deletions (6,7) and to a lesser extent small insertions (8). NHEJ appears mechanistically to be a potential source of microindels, however a review of the literature did not find microindels to be a common signature outcome of NHEJ.

Microindels were recently observed as a minority of events in a plasmid based NHEJ assay in mycobacteria (9).

***HPRT* microindels are similar to *TP53* microindels.**

The frequency of microindels requires a large database of mutations to obtain multiple microindels. To obtain a sample of microindels not in cancers for comparison, microindels were analyzed in *HPRT*. *HPRT* microindels were extracted from the Human *HPRT* Mutation Database (<http://www.ibiblio.org/dnam/mainpage.html>). Eleven *HPRT* microindels were identified: six somatic mutations with known mutagen exposure, four somatic mutations with no known mutagen exposure, and one germline mutation (SI Table 9). Among these *HPRT* microindels, 1-2 microindels are the most common type (45%, 5/11). This small sample of *HPRT* microindels has features that are generally similar to those of the sample of *TP53* microindels.

## Supplemental Figure Legends

**SI Figure 4. Spectrum of *TP53* somatic microindels.** The microindels are shown on the genomic sequence (GenBank accession X54156.1) containing the *TP53* gene. The nucleotide range displayed includes exons 3 through 9. Jagged vertical lines indicate breaks in the spectrum where intronic regions have been removed. Solid vertical lines indicate microindel counts.

**SI Figure 5. Distribution of the net sequence length change resulting from *TP53* somatic microindels.** The inset triangle shows the distribution of microindels classified by the number of nucleotides inserted and deleted (e.g., 9: 1-2 indicates that there are 9 microindels with 1 nt inserted and 2 nt deleted).

**SI Figure 6. Microindels graphed by type.** The counts of microindels of each type, defined by the number of nucleotides inserted and deleted, are graphed in a 2D grid with the length of the inserted sequence along the vertical axis and the length of deleted sequence along the horizontal axis. A) All *TP53* somatic microindels. B) Microindels in the Human Germline Mutation Database (HGMD).

**SI Figure 7. Comparison of size distributions of inserted and deleted sequences.**

Comparison of inserted (A) or deleted (B) sequence sizes in *TP53* pure microinsertions (A) or pure microdeletions (B), *TP53* somatic microindels, and germline (HGMD) microindels.

**SI Figure 8. Spectrum of *TP53* pure microinsertions.** The pure microinsertions are shown on the genomic sequence (GenBank accession X54156.1) containing the *TP53* gene. The nucleotide range displayed includes exons 3 through 9. Dashed vertical lines indicate the

beginning (short dashes) and ends (long dashes) of exons. Solid vertical lines indicate microinsertion counts.

**SI Figure 9. Alternative serial replication slippage models.** Serial replication slippage models (10,11) in cis (SRScis) and trans (SRStrans) were applied in attempts to explain, respectively, the first and last microindels shown in Fig. 2. A. Leading strand SRScis model for microindel 13337\_13345 del CATCTTATC ins GCCCCT. B. Lagging strand SRScis model for microindel 13337\_13345 del CATCTTATC ins GCCCCT. C. Leading-lagging-leading strand SRStrans model for microindel 123599\_123602 del CTCA ins TGAGTACTATGAG. D. Lagging-leading-lagging strand SRStrans model for microindel 123599\_123602 del CTCA ins TGAGTACTATGAG.

**SI Table 2. Comparison of Somatic and Germline Microindels, Microinsertions and Microdeletions**

| Mutation Types                       | Somatic        | Germline                  |             |
|--------------------------------------|----------------|---------------------------|-------------|
|                                      | <i>TP53</i>    | <i>F8</i> and <i>F9</i> * | HGMD†       |
| Base substitutions                   | 18,629 (88.4%) | 980 (82.1%)               | n/a         |
| Pure microinsertions ( $\leq 50$ bp) | 596 (2.8%)     | 50 (4.2%)                 | n/a         |
| Pure microdeletions ( $\leq 50$ bp)  | 1,782 (8.5%)   | 158 (13.2%)               | n/a         |
| Microindels (net of $\leq 50$ bp)    | 66 (0.3%)      | 5 (0.4%)                  | 155 (0.4%)  |
| Total mutation events                | 21,073‡        | 1,193                     | ~36,000     |
| Pure microinsertions (1-20 bp)       | 578 (97.0%)    | 48 (96.0%)                | n/a         |
| Pure microinsertions (21-50 bp)      | 18 (3.0%)      | 2 (4.0%)                  | n/a         |
| Pure microdeletions (1-20 bp)        | 1,649 (92.5%)  | 157 (99.4%)               | n/a         |
| Pure microdeletions (21-50 bp)       | 133 (7.5%)     | 1 (0.6%)                  | n/a         |
| Microindels, 1-20 bp net change      | 62 (93.9%)     | 5 (100%)                  | 155         |
| Microindels, 21-50 bp net change     | 4 (6.1%)       | 0                         | n/a§        |
| Microindels, Net gain                | 11 (16.7%)     | 4 (80.0%)                 | 58 (37.4%)  |
| Microindels, Net loss                | 55 (83.3%)     | 1 (20.0%)                 | 97 (62.6%)  |
| Microindels, 1-2 type                | 9 (13.6%)¶     | 0                         | 31 (20.0%)¶ |
| Microindels, 2-1 type                | 4 (6.1%)¶      | 0                         | 13 (8.4%)¶  |
| Microindels, 1-M type                | 32 (48.5%)¶    | 0                         | 55 (35.5%)¶ |
| Microindels, N-1 type                | 6 (9.1%)¶      | 1 (20.0%)¶                | 21 (13.5%)¶ |

\*Current values for mutations collected in our unpublished data; part of the *F9* data was summarized in Sommer et al. (2001). For *F8*, hotspot mutations were excluded, including the common inversion hotspot mutation and single base insertions/deletions at three 7-9 bp oligo A tracts within the coding sequence.

†The version of HGMD (Human Gene Mutation Database) used in the Chuzhanova et al. (2003) meta-analysis of indels, excluding those resulting in zero net length change (i.e., tandem-base mutations). “n/a” indicates that the count is not available.

‡Less than 21,587 since complex mutations, tandem-base mutations, and insertions and deletions larger than 50 bp are excluded.

§HGMD includes microindels in which the deleted and inserted sequences are ~22 bp or less.

¶Percentage of microindels.

**SI Table 3. Duplication errors for microindels in which the inserted sequence is at least six nucleotides.**

| Type                                                                  | Gene        | Nucleotide* | Insertion Size | Errors   |
|-----------------------------------------------------------------------|-------------|-------------|----------------|----------|
| Sense<br>duplication of<br>nearby but not<br>adjacent<br>sequence     | <i>TP53</i> | 13337       | 6              | 0        |
|                                                                       | <i>PTEN</i> | 30639       | 8              | 1        |
| Sense<br>duplication<br>overlapping the<br>deleted sequence           | <i>TP53</i> | 13145       | 8              | 2        |
|                                                                       | <i>CFTR</i> | 68869       | 6              | 1        |
|                                                                       |             | 110441      | 12             | 1        |
|                                                                       |             | 162287      | 11             | 1        |
|                                                                       | <i>EGFR</i> | 162295      | 7              | 1        |
| Antisense<br>duplication of<br>nearby but not<br>adjacent<br>sequence | <i>TP53</i> | 13959       | 7              | 0        |
|                                                                       |             | 13387       | 11             | 2        |
|                                                                       | <i>PTEN</i> | 94480       | 9              | 3        |
|                                                                       |             | <i>HPRT</i> | 33307          | 6        |
|                                                                       |             | 13163       | 8              | 1        |
| Antisense<br>duplication<br>overlapping the<br>deleted sequence       | <i>TP53</i> | 13320       | 8              | 0        |
|                                                                       | <i>CFTR</i> | 123599      | 13             | 3        |
| Total                                                                 |             |             | 120            | 16 (13%) |

\*Nucleotide numbering according to genomic reference sequences listed in Fig. 2 legend.

**SI Table 4. Putative mechanisms for microindels in which the inserted sequence is at least six nucleotides.**

|                                                           | Errors* |             |
|-----------------------------------------------------------|---------|-------------|
|                                                           | Zero    | One or More |
| Sense duplication of nearby but not adjacent sequence     | H       | H           |
| Antisense duplication of nearby but not adjacent sequence | HHM     | HHH         |
| Sense duplication overlapping the deleted sequence        | M       | HHHHH       |
| Antisense duplication overlapping the deleted sequence    | H       | H           |
| Sense duplication of adjacent sequence                    |         | M           |
| Antisense duplication of adjacent sequence                |         | M           |
| Putative Adduct Block                                     |         | M           |
| Other                                                     |         | M           |

\*Each “H” represents one microindel in the human *TP53*, *CFTR*, *EGFR*, *PTEN* and *HPRT* data herein. Each “M” represents one mouse microindel in the *lacI* data in Gonzalez et al (13).



**SI Table 5A. Somatic *TP53* Microindels**

| Nucleotide Range* | Ins-Del | 5' Flanking Sequence‡ (20 bp) | Sequence Inserted† | Sequence Deleted‡                         | 3' Flanking Sequence‡ (20 bp) | Cancer Topography                           | F/M | Age | PubMed ID |
|-------------------|---------|-------------------------------|--------------------|-------------------------------------------|-------------------------------|---------------------------------------------|-----|-----|-----------|
| 11912_11918       | 2-7     | CTCTTGCTCTTCAGACTTCC          | AG                 | TGAAAAC                                   | AACGTTCTGgtaaggacaag          | Liver & Intrahepatic Bile Ducts             |     |     | 12759240  |
| 12139_12140       | 1-2     | AATGCCAGAGGCTGCTCCCC          | T                  | GC                                        | GTGGCCCTGCACCAGCAGC           | Lung & Bronchus                             |     |     | 1324794   |
| 12234_12245       | 2-12    | TCCCTTCCCAGAAAACCTAC          | AG                 | CAGGGCAGCTAC                              | GGTTCCGCTCTGGGCTTCTT          | Breast                                      | F   |     | 7862445   |
| 12240_12245       | 4-6     | CCCAGAAAACCTACCAGGGC          | TTAA               | AGCTAC                                    | GGTTCCGCTCTGGGCTTCTT          | Breast                                      | F   | 84  | 7862445   |
| 12268_12287       | 1-20    | TTTCCGCTCTGGGCTTCTTGC         | C                  | ATTCTGGGACAGCCAAGTCT                      | GTGACTTGACGgtcagttg           | Mouth                                       |     |     | 12434417  |
| 12286             | 2-1     | GCATTCTGGGACAGCCAAGT          | GA                 | C                                         | TGTGACTTGACGgtcagtt           | Rectum                                      | M   | 59  | 9735666   |
| 12288_12302       | 1-15    | ATTCTGGGACAGCCAAGTCT          | T                  | GTGACTTGACGgtc                            | agttgcctgaggggctggc           | Breast                                      | F   | 38  | 7862445   |
| 12294_12300       | 1-7     | GGACGCCAAGTCTGTGACT           | A                  | TGCACGg                                   | tcagttgcctgaggggctg           | Breast                                      | F   |     | 8611423   |
| 13057_13061       | 1-5     | tcctctcctctcctacagTA          | A                  | CTCCC                                     | CTGCCCTCAACAAGATGTTT          | Renal Pelvis                                | F   | 71  | 10761705  |
| 13074             | 2-1     | gTACTCCCCTGCCCTCAACA          | TG                 | A                                         | GATGTTTTGCCCACTGGCCA          | Mouth                                       |     |     | 10225439  |
| 13082_13083       | 1-2     | CTGCCCTCAACAAGATGTTT          | C                  | TG                                        | CCAAGTGGCCAAGACCTGCC          | Breast                                      | F   |     | 12203794  |
| 13093_13100       | 1-8     | AAGATGTTTTGCCAAGTGGC          | G                  | CAAGACCT                                  | GCCCTGTGCAGCTGTGGGTT          | Ovary                                       | F   | 41  | 9550561   |
| 13116_13117       | 1-2     | GACCTGCCCTGTGCAGCTGT          | A                  | GG                                        | GTTGATTCCACACCCCGCC           | Breast                                      | F   | 71  | 14697642  |
| 13122_13123       | 1-2     | CCCTGTGCAGCTGTGGGTTG          | G                  | AT                                        | TCCACACCCCGCCCGGCAC           | Lung & Bronchus                             | M   | 69  | 10353731  |
| 13127_13133       | 1-7     | TGCAGCTGTGGGTTGATTCC          | N†                 | ACACCCC                                   | CGCCCGGACCCCGCTCCGC           | Ovary                                       | F   |     | 8934544   |
| 13132_13133       | 1-2     | CTGTGGGTTGATTCCACACC          | T                  | CC                                        | CGCCCGGACCCCGCTCCGC           | Skin§                                       |     |     | 11668523  |
| 13134_13135       | 1-2     | GTGGGTTGATTCCACACCCC          | T                  | CG                                        | CCGGCACCCTGCTCCGCGC           | Larynx                                      | M   | 49  | 7882279   |
| 13145_13155       | 8-11¶   | CCACACCCCGCCCGGCACC           | TGCGTGC            | CGCGTCCGCGC                               | CATGGCCATCTACAAGCAGT          | Colorectum, NOS                             | M   | 69  | 1319835   |
| 13157_13160       | 3-4     | CCGGCACCCTGCTCCGCGCC          | TCT                | ATGG                                      | CCATCTACAAGCAGTCACAG          | Oropharynx                                  | M   |     | 21225878  |
| 13184_13198       | 4-15    | TCTACAAGCAGTCACAGCAC          | NNNN†              | ATGACGGAGGTGTG                            | AGGCGCTGCCCCACCATGA           | Ovary                                       | F   |     | 9723023   |
| 13201_13209       | 3-9     | CACATGACGGAGGTTGTGAG          | CCT                | GCGCTGCC                                  | CCACCATGACGCTGCTCAG           | Breast                                      | F   | 37  | 8950983   |
| 13209_13217       | 1-9     | GGAGGTTGTGAGGCGTGCC           | A                  | CCCACCATG                                 | AGCGCTGCTCAGATAGCGAT          | Ovary                                       | F   | 49  | 21199244  |
| 13320_13334       | 8-15    | tcctcactgattgctcttag          | CAGACCTA           | GTCTGGCCCCCTCCTC                          | AGCATCTTATCCGAGTGGAA          | Stomach                                     |     |     | 8180781   |
| 13333_13368       | 1-36    | ctcttagGTCTGGCCCTCC           | C                  | TCAGCATCTTATCCGAGTGGAAAGGA<br>AATTGGCGTGT | GGAGTATTTGGATGACAGAA          | Renal Pelvis                                | F   | 66  | 9761125   |
| 13337_13345       | 6-9     | TAGGTCTGGCCCTCCTCAG           | GCCCT              | CATCTTATC                                 | CGAGTGGAAAGAAATTTGCG          | Ovary                                       | F   |     | 9891239   |
| 13381_13382       | 3-2     | TTGCGTGTGGAGTATTTGGA          | ATT                | TG                                        | ACAGAAACACTTTTCGACAT          | Skin§                                       |     | 28  | 8319200   |
| 13385_13387       | 1-3     | GTGTGGAGTATTTGGATGAC          | T                  | AGA                                       | AACACTTTTCGACATAGTGTG         | Brain                                       | F   | 26  | 9224526   |
| 13387_13388       | 3-2     | GTGGAGTATTTGGATGACAG          | CCC                | AA                                        | AACTTTTCGACATAGTGTG           | Hematopoietic & Reticuloendothelial Systems |     |     | 7727782   |
| 13387_13392       | 11-6    | GTGGAGTATTTGGATGACAG          | CCCACACGCAT        | AAACAC                                    | TTTTCGACATAGTGTGGTGG          | Hematopoietic & Reticuloendothelial Systems |     |     | 8289498   |
| 13397_13404       | 2-8     | TGGATGACAGAAACACTTTT          | AT                 | CGACATAG                                  | TGTGGTGGTGCCCTATGAGC          | Ovary                                       | F   |     | 8481915   |
| 13397_13404       | 1-8     | TGGATGACAGAAACACTTTT          | A                  | CGACATAG                                  | TGTGGTGGTGCCCTATGAGC          | Colorectum, NOS                             |     |     | 9516972   |
| 13413_13417       | 4-5     | TTTTCGACATAGTGTGGTGG          | NNNN†              | TGCC                                      | TATGAGCCGCTGAGgtctg           | Breast                                      | F   | 54  | 9569050   |
| 13425_13427       | 2-3     | TGTGTGGTGCCCTATGAGC           | TG                 | CGC                                       | CTGAGgtctggttgcaact           | Skin§                                       |     |     | 7997263   |
| 13431             | 3-1     | GGTGCCCTATGAGCCGCTG           | TCT                | A                                         | Ggtctggttgcaactgggg           | Lung & Bronchus                             |     |     | 15161705  |
| 14011_14026       | 1-16    | atctcctagGTTGGCTCTGA          | T                  | CTGTACCACCATCCAC                          | TACAACACTACATGTAACAG          | Esophagus                                   | M   | 62  | 7768632   |
| 14013_14014       | 1-2     | ctcctagGTTGGCTCTGACT          | A                  | GT                                        | ACCACCATCCACTACAACATA         | Mouth                                       |     |     | 10225439  |
| 14029_14032       | 1-4     | GACTGTACCACCATCCACTA          | G                  | CAAC                                      | TACATGTGTAACAGTTCCTG          | Liver & Intrahepatic Bile Ducts             | M   | 40  | 10212000  |

|             |      |                        |      |                         |                      |                                                                  |   |    |          |
|-------------|------|------------------------|------|-------------------------|----------------------|------------------------------------------------------------------|---|----|----------|
| 14037_14050 | 2-14 | CACCATCCACTACAACACTACA | CG   | TGTGTAACAGTTCC          | TGCATGGGCGGCATGAACCG | Ovary                                                            | F | 50 | 21199244 |
| 14040_14042 | 2-3  | CATCCACTACAACACTACATGT | TT   | GTA                     | ACAGTTCCTGCATGGGCGGC | Breast                                                           | F | 63 | 8611423  |
| 14042_14045 | 1-4  | TCCACTACAACACTACATGTGT | T    | AACA                    | GTTCTGCATGGGCGGCATG  | Hematopoietic & Reticuloendothelial Systems                      | M | 84 | 1959992  |
| 14042_14045 | 1-4  | TCCACTACAACACTACATGTGT | T    | AACA                    | GTTCTGCATGGGCGGCATG  | Liver & Intrahepatic Bile Ducts                                  | F | 63 | 15288479 |
| 14045_14054 | 1-10 | ACTACAACACTACATGTGTAAC | G    | AGTTCCTGCA              | TGGGCGGCATGAACCGGAGG | Corpus Uteri                                                     | F | 76 | 11733960 |
| 14055_14068 | 1-14 | CATGTGTAACAGTTCCTGCA   | A    | TGGGCGGCATGAAC          | CGGAGGCCCATCCTCACCAT | Breast                                                           | F |    | 11051239 |
| 14066_14072 | 1-7  | GTTCTGCATGGGCGGCATG    | G    | AACCGGA                 | GGCCCATCCTCACCATCATC | Bladder                                                          |   |    | 21278281 |
| 14070_14073 | 3-4  | CTGCATGGGCGGCATGAACC   | AGA  | GGAG                    | GCCCATCCTCACCATCATCA | Colorectum, NOS                                                  |   |    | 15541358 |
| 14072_14073 | 1-2  | GCATGGGCGGCATGAACCGG   | T    | AG                      | GCCCATCCTCACCATCATCA | Colorectum, NOS                                                  |   |    | 12921629 |
| 14074_14078 | 4-5  | ATGGGCGGCATGAACCGGAG   | ACCC | GCCCA                   | TCCTCACCATCATCACACTG | Breast                                                           | F |    | 9288052  |
| 14088_14089 | 4-2  | CCGGAGGCCCATCCTCACCA   | ATCA | TC                      | ATCACACTGGAAGACTCCAG | Esophagus                                                        | M | 72 | 8722219  |
| 14105       | 2-1  | CCATCATCACACTGGAAGAC   | GC   | T                       | CCAGgtcaggagccacttgc | Kidney                                                           |   |    | 7633433  |
| 14453_14475 | 1-23 | cttttctctatcctgagtagT  | A    | GGTAATCTACTGGGACGGAACAG | CTTTGAGGTGCGTGTTTGTG | Lung & Bronchus                                                  |   |    | 8934544  |
| 14462_14476 | 1-15 | tcctgagtagTGGTAATCTA   | A    | CTGGGACGGAACAGC         | TTTGAGGTGCGTGTTTGTG  | Lung & Bronchus                                                  | F | 73 | 7767998  |
| 14486_14488 | 4-3  | GACGGAACAGCTTTGAGGTG   | TGTC | CGT                     | GTTTGTGCCTGTCTGGGAG  | Esophagus                                                        | F | 54 | 8722219  |
| 14487       | 2-1  | ACGGAACAGCTTTGAGGTGC   | CC   | G                       | TGTTTGTGCCTGTCTGGGA  | Hematopoietic & Reticuloendothelial Systems                      | F | 65 | 1423304  |
| 14511_14515 | 1-5  | TTGTGCCTGTCTGGGAGAG    | C    | ACCGG                   | CGCACAGAGGAAGAGAATCT | Larynx                                                           | M |    | 21225878 |
| 14514       | 3-1  | TGCCCTGTCTGGGAGAGACC   | CCC  | G                       | GCGCACAGAGGAAGAGAATC | Hematopoietic & Reticuloendothelial Systems                      |   |    | 8289498  |
| 14515_14518 | 3-4  | GCCTGTCTGGGAGAGACCG    | ACG  | GCGC                    | ACAGAGGAAGAGAATCTCCG | Bones, Joints & Articular Cartilage of Other & Unspecified Sites |   |    | 8336944  |
| 14515_14518 | 2-4  | GCCTGTCTGGGAGAGACCG    | AG   | GCGC                    | ACAGAGGAAGAGAATCTCCG | Pancreas                                                         | M | 75 | 8569192  |
| 14537_14538 | 1-2  | GCACAGAGGAAGAGAATCTC   | T    | CG                      | CAAGAAAGGGGAGCCTCACC | Skin§                                                            |   |    | 10498902 |
| 14538_14553 | 1-16 | CACAGAGGAAGAGAATCTCC   | T    | GCAAGAAAGGGGAGCC        | TCACCACGAGCTGCCCCAG  | Corpus Uteri                                                     | F | 77 | 14976538 |
| 14551_14554 | 3-4  | AATCTCCGCAAGAAAGGGGA   | ACC  | GCCT                    | CACCACGAGCTGCCCCAGG  | Breast                                                           | F |    | 21217967 |
| 14555_14578 | 1-24 | TCCGCAAGAAAGGGGAGCCT   | T    | CACCACGAGCTGCCCCAGGGAGC | ACTAAGCGAGgtaagcaagc | Ovary                                                            | F |    | 10682669 |
| 14555_14578 | 2-24 | TCCGCAAGAAAGGGGAGCCT   | GT   | CACCACGAGCTGCCCCAGGGAGC | ACTAAGCGAGgtaagcaagc | Ovary                                                            | F |    | 10682669 |
| 14557_14560 | 3-4  | CGCAAGAAAGGGGAGCCTCA   | TTA  | CCAC                    | GAGCTGCCCCAGGGAGCAC  | Skin§                                                            | F | 28 | 21090798 |
| 14571_14575 | 3-5  | GCCTCACCACGAGCTGCCCC   | AGG  | CAGGG                   | AGCACTAAGCGAGgtaagca | Adrenal Gland                                                    |   |    | 11454518 |
| 14726_14729 | 3-4  | TCCCCAGCCAAGAAGAACA    | GAC  | CACT                    | GGATGGAGAATATTTACCC  | Mouth                                                            |   |    | 10225439 |
| 14755_14757 | 1-3  | GAGAAATTTACCCCTTCAG    | c    | gta                     | ctaagtcttgggacctcta  | Pancreas                                                         | F | 64 | 8569192  |

**Total 66**

\*Range of deleted nucleotides. Numbering according to GenBank genomic sequence accession X54156.1.

†Inserted sequence was extracted from the primary publication, but was not available for three of the microindels (inserted sequence shown as N's).

‡Upper case letters indicate exon sequence; lower case letters indicate intron sequence.

§Excludes Skin of Vulva, Skin of Penis, Skin of Scrotum.

¶We note that an alternate interpretation of the 8-11 microindel at nucleotide 13145 is as a rare doublet mutation composed of two rare types of mutation: an insertion that does not repeat the adjacent base separated by six nucleotides from a 1-5 microindel.

**SI Table 5B. Germline *TP53* Microindels**

| <b>Nucleotide Range*</b> | <b>Ins-Del</b> | <b>5' Flanking Sequence†<br/>(20 bp)</b> | <b>Sequence Inserted</b> | <b>Sequence Deleted</b> | <b>3' Flanking Sequence†<br/>(20 bp)</b> | <b>Phenotype</b>          | <b>F/M</b> | <b>Age</b> | <b>PubMed ID</b> |
|--------------------------|----------------|------------------------------------------|--------------------------|-------------------------|------------------------------------------|---------------------------|------------|------------|------------------|
| 12246_12256              | 5-11           | AAACCTACCAGGGCAGCTAC                     | ATTCA                    | GGTTCCGTCT              | GGGCTTCTGCATTCGGGA                       | Li-Fraumeni Syndrome      | M          |            | 8118819          |
| 13477_13479              | 5-3            | gggaggaggggtaagggtg                      | agtta                    | gtt                     | gtcagtggccctccgggtga                     | Putative Neutral Variant‡ | M          |            | 9180930          |
| 13959_13964              | 7-6            | tgcttgccacaggtctccc                      | cagagcc                  | aaggcg                  | cactggcctcatcttgggcc                     | Putative Neutral Variant§ |            | 39         | 1686725          |

**Total**                    **3**

\*Range of deleted nucleotides. Numbering according to GenBank genomic sequence accession X54156.1.

†Upper case letters indicate exon sequence; lower case letters indicate intron sequence.

‡Putative neutral variant at IVS6+45 reported in two individuals.

§Putative neutral variant at IVS6-41.

‡,§Normal tissue was not analyzed. Does not obviously affect splicing.

**SI Table 6A. Reported *TP53* Substitutions at 5' and 3' Deleted Nucleotides of Somatic *TP53* 1-M Microindels**

| Nucleotide Range* | Ins-Del | Reported <i>TP53</i> Substitutions at 5' deleted nucleotide (instances, percentile)†‡ | Sequence Inserted | Sequence Deleted‡                    | Reported <i>TP53</i> Substitutions at 3' deleted nucleotide (instances, percentile)†‡ | PubMed ID |
|-------------------|---------|---------------------------------------------------------------------------------------|-------------------|--------------------------------------|---------------------------------------------------------------------------------------|-----------|
| 12139_12140       | 1-2     | 12139G>T(1, 32%)                                                                      | T                 | GC                                   |                                                                                       | 1324794   |
| 12268_12287       | 1-20    |                                                                                       | C                 | ATTCTGGGACAGCCAAGTCT                 |                                                                                       | 12434417  |
| 12288_12302       | 1-15    | 12288G>T(1, 32%)                                                                      | T                 | GTGACTTGCACGgtc                      |                                                                                       | 7862445   |
| 12294_12300       | 1-7     | 12294T>A(1, 32%)                                                                      | A                 | TGCACGg                              | 12300g>A(4, 65%)                                                                      | 8611423   |
| 13057_13061       | 1-5     | 13057C>A(6, 74%)                                                                      | A                 | CTCCC                                |                                                                                       | 10761705  |
| 13082_13083       | 1-2     | 13082T>C(8, 79%)                                                                      | C                 | TG                                   | 13083G>C(5, 71%)                                                                      | 12203794  |
| 13093_13100       | 1-8     | 13093C>G(2, 48%)                                                                      | G                 | CAAGACCT                             | 13100T>G(1, 32%)                                                                      | 9550561   |
| 13116_13117       | 1-2     | 13116G>A(43, 96%)*                                                                    | A                 | GG                                   | 13117G>A(44, 97%)*                                                                    | 14697642  |
| 13122_13123       | 1-2     |                                                                                       | G                 | AT                                   | 13123T>G(2, 48%)                                                                      | 10353731  |
| 13132_13133       | 1-2     | 13132C>T(10, 83%)                                                                     | T                 | CC                                   | 13133C>T(27, 94%)                                                                     | 11668523  |
| 13134_13135       | 1-2     | 13134C>T(67, 98%)*                                                                    | T                 | CG                                   | 13135G>T(1, 32%)                                                                      | 7882279   |
| 13209_13217       | 1-9     | 13209C>A(2, 48%)                                                                      | A                 | CCCACCATG                            | 13217G>A(9, 82%)                                                                      | 21199244  |
| 13333_13368       | 1-36    | 13333T>C(1, 32%)                                                                      | C                 | TCAGCATCTTATCCGAGTGGAAGGAAATTTGCGTGT | 13368T>C(3, 58%)                                                                      | 9761125   |
| 13385_13387       | 1-3     | 13385A>T(11, 85%)                                                                     | T                 | AGA                                  | 13387A>T(1, 32%)                                                                      | 9224526   |
| 13397_13404       | 1-8     | 13397C>A(1, 32%)                                                                      | A                 | CGACATAG                             | 13404G>A(15, 90%)                                                                     | 9516972   |
| 14011_14026       | 1-16    | 14011C>T(3, 58%)                                                                      | T                 | CTGTACCACCATCCAC                     | 14026C>T(6, 74%)                                                                      | 7768632   |
| 14013_14014       | 1-2     | 14013G>A(3, 58%)                                                                      | A                 | GT                                   | 14014T>A(5, 71%)                                                                      | 10225439  |
| 14029_14032       | 1-4     | 14029C>G(1, 32%)                                                                      | G                 | CAAC                                 |                                                                                       | 10212000  |
| 14042_14045       | 1-4     | 14042A>T(8, 79%)                                                                      | T                 | AACA                                 | 14045A>T(5, 71%)                                                                      | 1959992   |
| 14042_14045       | 1-4     | 14042A>T(8, 79%)                                                                      | T                 | AACA                                 | 14045A>T(5, 71%)                                                                      | 15288479  |
| 14045_14054       | 1-10    | 14045A>G(19, 92%)                                                                     | G                 | AGTTCCTGCA                           | 14054A>G(2, 48%)                                                                      | 11733960  |
| 14055_14068       | 1-14    | 14055T>A(4, 65%)                                                                      | A                 | TGGGCGGCATGAAC                       | 14068C>A(2, 48%)                                                                      | 11051239  |
| 14066_14072       | 1-7     | 14066A>G(7, 77%)                                                                      | G                 | AACCGGA                              | 14072A>G(39, 96%)*                                                                    | 21278281  |
| 14072_14073       | 1-2     | 14072A>T(32, 95%)*                                                                    | T                 | AG                                   | 14073G>T(57, 97%)*                                                                    | 12921629  |
| 14453_14475       | 1-23    | 14453G>A(6, 74%)                                                                      | A                 | GGTAATCTACTGGGACGGAACAG              | 14475G>A(8, 79%)                                                                      | 8934544   |
| 14462_14476       | 1-15    | 14462C>A(5, 71%)                                                                      | A                 | CTGGGACGGAACAGC                      | 14476C>A(1, 32%)                                                                      | 7767998   |
| 14511_14515       | 1-5     | 14511A>C(3, 58%)                                                                      | C                 | ACCGG                                | 14515G>C(1, 32%)                                                                      | 21225878  |
| 14537_14538       | 1-2     | 14537C>T(8, 79%)                                                                      | T                 | CG                                   | 14538G>T(8, 79%)                                                                      | 10498902  |
| 14538_14553       | 1-16    | 14538G>T(8, 79%)                                                                      | T                 | GCAAGAAAGGGGAGCC                     | 14553C>T(7, 77%)                                                                      | 14976538  |
| 14555_14578       | 1-24    | 14555C>T(9, 82%)                                                                      | T                 | CACCACGAGCTGCCCCAGGGAGC              |                                                                                       | 10682669  |
| 14755_14757       | 1-3     | 14755g>c(1, 32%)                                                                      | c                 | gta                                  |                                                                                       | 8569192   |

**Total 31**

\*Range of deleted nucleotides. Numbering according to GenBank genomic sequence accession X54156.1.

†Reported instances in the IARC *TP53* Mutation Database version 10 [Olivier et al., 2002] of substitutions from the deleted nucleotide to the inserted nucleotide. Percentages are the substitution percentiles, the percentage of substitutions with the same or fewer instances recorded in the database. Substitutions at or above the 95<sup>th</sup> percentile are marked with an asterisk.

‡Upper case letters indicate exon sequence; lower case letters indicate intron sequence.

**SI Table 6B. Reported *TP53* Substitutions at 5' and 3' Inserted Nucleotides of Somatic *TP53* N-1 Microindels**

| <b>Nucleotide Range*</b> | <b>Ins-Del</b> | <b>Reported <i>TP53</i> Substitutions at 5' deleted nucleotide (instances, percentile)†‡</b> | <b>Sequence Inserted</b> | <b>Sequence Deleted‡</b> | <b>Reported <i>TP53</i> Substitutions at 3' deleted nucleotide (instances, percentile)†‡</b> | <b>PubMed ID</b> |
|--------------------------|----------------|----------------------------------------------------------------------------------------------|--------------------------|--------------------------|----------------------------------------------------------------------------------------------|------------------|
| 12286                    | 2-1            |                                                                                              | GA                       | C                        |                                                                                              | 9735666          |
| 13074                    | 2-1            | 13074A>T(9, 82%)                                                                             | TG                       | A                        | 13074A>G(46, 97%)                                                                            | 10225439         |
| 13431                    | 3-1            | 13431A>T(1, 32%)                                                                             | TCT                      | A                        | 13431A>T(1, 32%)                                                                             | 15161705         |
| 14105                    | 2-1            | 14105T>G(3, 58%)                                                                             | GC                       | T                        | 14105T>C(2, 48%)                                                                             | 7633433          |
| 14487                    | 2-1            | 14487G>C(30, 95%)                                                                            | CC                       | G                        | 14487G>C(30, 95%)                                                                            | 1423304          |
| 14514                    | 3-1            | 14514G>C(15, 90%)                                                                            | CCC                      | G                        | 14514G>C(15, 90%)                                                                            | 8289498          |

**Total 6**

\*Range of deleted nucleotides. Numbering according to GenBank genomic sequence accession X54156.1.

†Reported instances in the IARC *TP53* Mutation Database version 10 [Olivier et al., 2002] of substitutions from the deleted nucleotide to the inserted nucleotide. Percentages are the substitution percentiles, the percentage of substitutions with the same or fewer instances recorded in the database.

‡Upper case letters indicate exon sequence; lower case letters indicate intron sequence.

**SI Table 7. *TP53* Substitutions Categorized by Observed Frequency in the IARC *TP53* Mutation Database\***

| <b>#Instances in IARC <i>TP53</i> Mutation Database</b> | <b>Hypothesized Substitutions at 5' and 3' Deleted Nucleotides in 1-M Microindels<sup>†</sup></b> | <b>Hypothesized Substitutions at 5' and 3' Inserted Nucleotides in N-1 Microindels<sup>‡</sup></b> | <b>Substitutions in IARC <i>TP53</i> Mutation Database</b> | <b>Uniform Distribution over Unique Substitutions in IARC <i>TP53</i> Mutation Database</b> |
|---------------------------------------------------------|---------------------------------------------------------------------------------------------------|----------------------------------------------------------------------------------------------------|------------------------------------------------------------|---------------------------------------------------------------------------------------------|
| 1                                                       | 12 (22.6%)                                                                                        | 2 (20.0%)                                                                                          | 597 (3.2%)                                                 | 5977 (32.1%)                                                                                |
| 2-5                                                     | 16 (30.2%)                                                                                        | 2 (20.0%)                                                                                          | 2244 (12.0%)                                               | 7249 (38.9%)                                                                                |
| 6-10                                                    | 15 (28.3%)                                                                                        | 1 (10.0%)                                                                                          | 1790 (9.6%)                                                | 2333 (12.5%)                                                                                |
| 11-100                                                  | 10 (18.9%)                                                                                        | 5 (50.0%)                                                                                          | 7565 (40.6%)                                               | 2874 (15.4%)                                                                                |
| >100                                                    | 0 (0.0%)                                                                                          | 0 (0.0%)                                                                                           | 6447 (34.6%)                                               | 210 (1.1%)                                                                                  |
| <b>Total</b>                                            | <b>53</b>                                                                                         | <b>10</b>                                                                                          | <b>18643</b>                                               | <b>18643</b>                                                                                |

\*IARC *TP53* Mutation Database version 10 [Olivier et al., 2002].

<sup>†</sup>Substitutions based on an alternative model of a deletion of one less nucleotide (either on the 5' or 3' end) with substitution of that nucleotide (instead of the insertion).

<sup>‡</sup>Substitutions based on an alternative model of a insertion of one less nucleotide (either on the 5' or 3' end) with substitution of that nucleotide (instead of the deletion).

**SI Table 8. EGFR Recurreoids\***

| <b>Nucleotide Range†</b> | <b>Ins-Del</b> | <b>5' Flanking Sequence (20 bp)</b> | <b>Sequence Inserted</b> | <b>Sequence Deleted</b>   | <b>3' Flanking Sequence (20 bp)</b> | <b>Database ID*</b> | <b>Recurroid Site Type</b>                           | <b>PubMed ID</b>                                                                  |
|--------------------------|----------------|-------------------------------------|--------------------------|---------------------------|-------------------------------------|---------------------|------------------------------------------------------|-----------------------------------------------------------------------------------|
| 2235_2252                | 3-18           | AAAATTCCCGTCGCTATCAA                | AAT                      | GGAATTAAGAGAAGCAAC        | ATCTCCGAAAGCCAACAAGG                | 2248                | Insertion Identical                                  | 16052218                                                                          |
| 2235_2255                | 3-21           | AAAATTCCCGTCGCTATCAA                | AAT                      | GGAATTAAGAGAAGCAACATC     | TCCGAAAGCCAACAAGGAAA                | 1856                |                                                      | 15741570                                                                          |
| 2236_2248                | 4-13           | AAATTCGTCGCTATCAAG                  | AGAC                     | GAATTAAGAGAAG             | CAACATCTCCGAAAGCCAAC                | 85                  | Deletion Identical                                   | 15604253                                                                          |
| 2236_2248                | 4-13           | AAATTCGTCGCTATCAAG                  | CAAC                     | GAATTAAGAGAAG             | CAACATCTCCGAAAGCCAAC                | 2341                |                                                      | 15899142                                                                          |
| 2237_2252                | 1-16           | AATTCGTCGCTATCAAGG                  | T                        | AATTAAGAGAAGCAAC          | ATCTCCGAAAGCCAACAAGG                | 1857                | Hybrid Site:<br>2 variants of<br>Insertion Identical | 15741570                                                                          |
| 2237_2255                | 1-19           | AATTCGTCGCTATCAAGG                  | T                        | AATTAAGAGAAGCAACATC       | TCCGAAAGCCAACAAGGAAA                | 25                  |                                                      | 15118125                                                                          |
| 2245_2252                | 1-8            | TCGCTATCAAGGAATTAAGA                | T                        | GAAGCAAC                  | ATCTCCGAAAGCCAACAAGG                | 33                  |                                                      | 15329413                                                                          |
| 2237_2253                | 2-17           | AATTCGTCGCTATCAAGG                  | TC                       | AATTAAGAGAAGCAACA         | TCTCCGAAAGCCAACAAGGA                | 2801                |                                                      | 16152581                                                                          |
| 2237_2256                | 2-20           | AATTCGTCGCTATCAAGG                  | TC                       | AATTAAGAGAAGCAACATCT      | CCGAAAGCCAACAAGGAAAT                | 3165                |                                                      | 16533793                                                                          |
| 2239_2248                | 1-10           | TTCCCGTCGCTATCAAGGAA                | C                        | TTAAGAGAAG                | CAACATCTCCGAAAGCCAAC                | 22                  |                                                      | Hybrid Site:<br>Deletion Identical<br>plus two variants of<br>Insertion Identical |
| 2239_2251                | 1-13           | TTCCCGTCGCTATCAAGGAA                | C                        | TTAAGAGAAGCAA             | CATCTCCGAAAGCCAACAAG                | 83                  | 15604253                                             |                                                                                   |
| 2241_2248                | 1-8            | CCCGTCGCTATCAAGGAATT                | C                        | AAGAGAAG                  | CAACATCTCCGAAAGCCAAC                | 2246                | 16052218                                             |                                                                                   |
| 2241_2251                | 1-11           | CCCGTCGCTATCAAGGAATT                | C                        | AAGAGAAGCAA               | TCTCCGAAAGCCAACAAGGA                | 2249                | 16052218                                             |                                                                                   |
| 2239_2252                | 2-14           | TTCCCGTCGCTATCAAGGAA                | CA                       | TTAAGAGAAGCAAC            | ATCTCCGAAAGCCAACAAGG                | 89                  | 15604253                                             |                                                                                   |
| 2239_2258                | 2-20           | TTCCCGTCGCTATCAAGGAA                | CA                       | TTAAGAGAAGCAACATCTCC      | GAAAGCCAACAAGGAAATCC                | 84                  | 15604253                                             |                                                                                   |
| 2239_2252                | 5-14           | TTCCCGTCGCTATCAAGGAA                | CCAAT                    | TTAAGAGAAGCAAC            | ATCTCCGAAAGCCAACAAGG                | 2306                | 15958609                                             |                                                                                   |
| 2252_2276                | 1-25           | CAAGGAATTAAGAGAAGCAA                | A                        | CATCTCCGAAAGCCAACAAGGAAAT | CCTCGATGAAGCCTACGTGA                | 2004                | Deletion Identical                                   |                                                                                   |
| 2252_2276                | 1-25           | CAAGGAATTAAGAGAAGCAA                | G                        | CATCTCCGAAAGCCAACAAGGAAAT | CCTCGATGAAGCCTACGTGA                | 104                 |                                                      | 15604253                                                                          |

\*Data from the Epidermal Growth Factor Receptor (EGFR) Mutation Database ([http://www.cityofhope.org/cmdl/egfr\\_db](http://www.cityofhope.org/cmdl/egfr_db)).

†Range of deleted nucleotides. Numbering according to GenBank cDNA sequence accession NM\_005228.3 (coding sequence starts at base 247).

**SI Table 9A. Somatic HPRT Microindels\***

| Nucleotide Range† | Ins-Del | 5' Flanking Sequence (20 bp) | Sequence Inserted | Sequence Deleted | 3' Flanking Sequence (20 bp) | Database ID* | Mutagen     | PubMed ID |
|-------------------|---------|------------------------------|-------------------|------------------|------------------------------|--------------|-------------|-----------|
| 13163_13176       | 8-14    | ATGAACCAGGTTATGACCTT         | AGGAAGAA          | GATTTATTTTGCAT   | ACCTAATCATTATGCTGAGG         | 978          | Smoker      | 1394847   |
| 13222_13224       | 1-3     | GAAAGGGTGTATTTCCTCA          | A                 | TGG              | ACTAATTATGGACAGgtaag         | 1140         | Spontaneous | 8513767   |
| 15063_15064       | 1-2     | TTTGCTGACCTGCTGGATTA         | T                 | CA               | TCAAAGCACTGAATAGAAAT         | 327          | UV (G1)     | 2005888   |
| 33294_33306       | 2-13    | tttgaaagGATATAATTGAC         | TC                | ACTGGCAAACAA     | TGCAGACTTTGCTTTCCTTG         | 1351         | Spontaneous | 8404873   |
| 33310_33317       | 3-8     | TGACACTGGCAAACAATGC          | CGA               | AGACTTTG         | CTTTCCTTGGTCAGGCAGTA         | 1352         | Spontaneous | 8404873   |
| 33331_33332       | 1-2     | GACTTTGCTTTCCTTGGTCA         | T                 | GG               | CAGTATAATCCAAGATGGT          | 879          | BPDE (S)    | 1902394   |
| 38166_38167       | 1-2     | acattttgtaattaacagCT         | C                 | TG               | CTGGTGAAAAGGACCCACG          | 1260         | MNNG (G1/S) | 8504428   |
| 38444             | 2-1     | CCCTTGACTATAATGAATAC         | CC                | T                | TCAGGGATTGAATgtaagt          | 954          | Spontaneous | 1394847   |
| 38448_38449       | 1-2     | TGACTATAATGAATACTTCA         | A                 | GG               | GATTTGAATgtaagtaattg         | 284          | UV (S)      | 2005888   |
| 38452_38453       | 1-2     | TATAATGAATACTTCAGGGA         | C                 | TT               | TGAATgtaagtaattgcttc         | 184          | UV (G1)     | 2005888   |

**Total 10**

\*Data from the Human HPRT Mutation Database (<http://www.ibiblio.org/dnam/mainpage.html>).

†Range of deleted nucleotides. Numbering according to GenBank genomic sequence accession NC\_000023.9 region 133421923 to 133462362.

**SI Table 9B. Germline HPRT Microindels\***

| Nucleotide Range† | Ins-Del | 5' Flanking Sequence (20 bp) | Sequence Inserted | Sequence Deleted | 3' Flanking Sequence (20 bp) | Database ID* | Phenotype   | PubMed ID |
|-------------------|---------|------------------------------|-------------------|------------------|------------------------------|--------------|-------------|-----------|
| 33307_33311       | 6-5     | AATTGACACTGGCAAACAA          | AGCAAA            | TGCAG            | ACTTTGCTTTCCTTGGTCAG         | 140          | Lesch-Nyhan | 2928313   |

**Total 1**

\*Data from the Human HPRT Mutation Database (<http://www.ibiblio.org/dnam/mainpage.html>).

†Range of deleted nucleotides. Numbering according to GenBank genomic sequence accession NC\_000023.9 region 133421923 to 133462362.



SI Figure 4

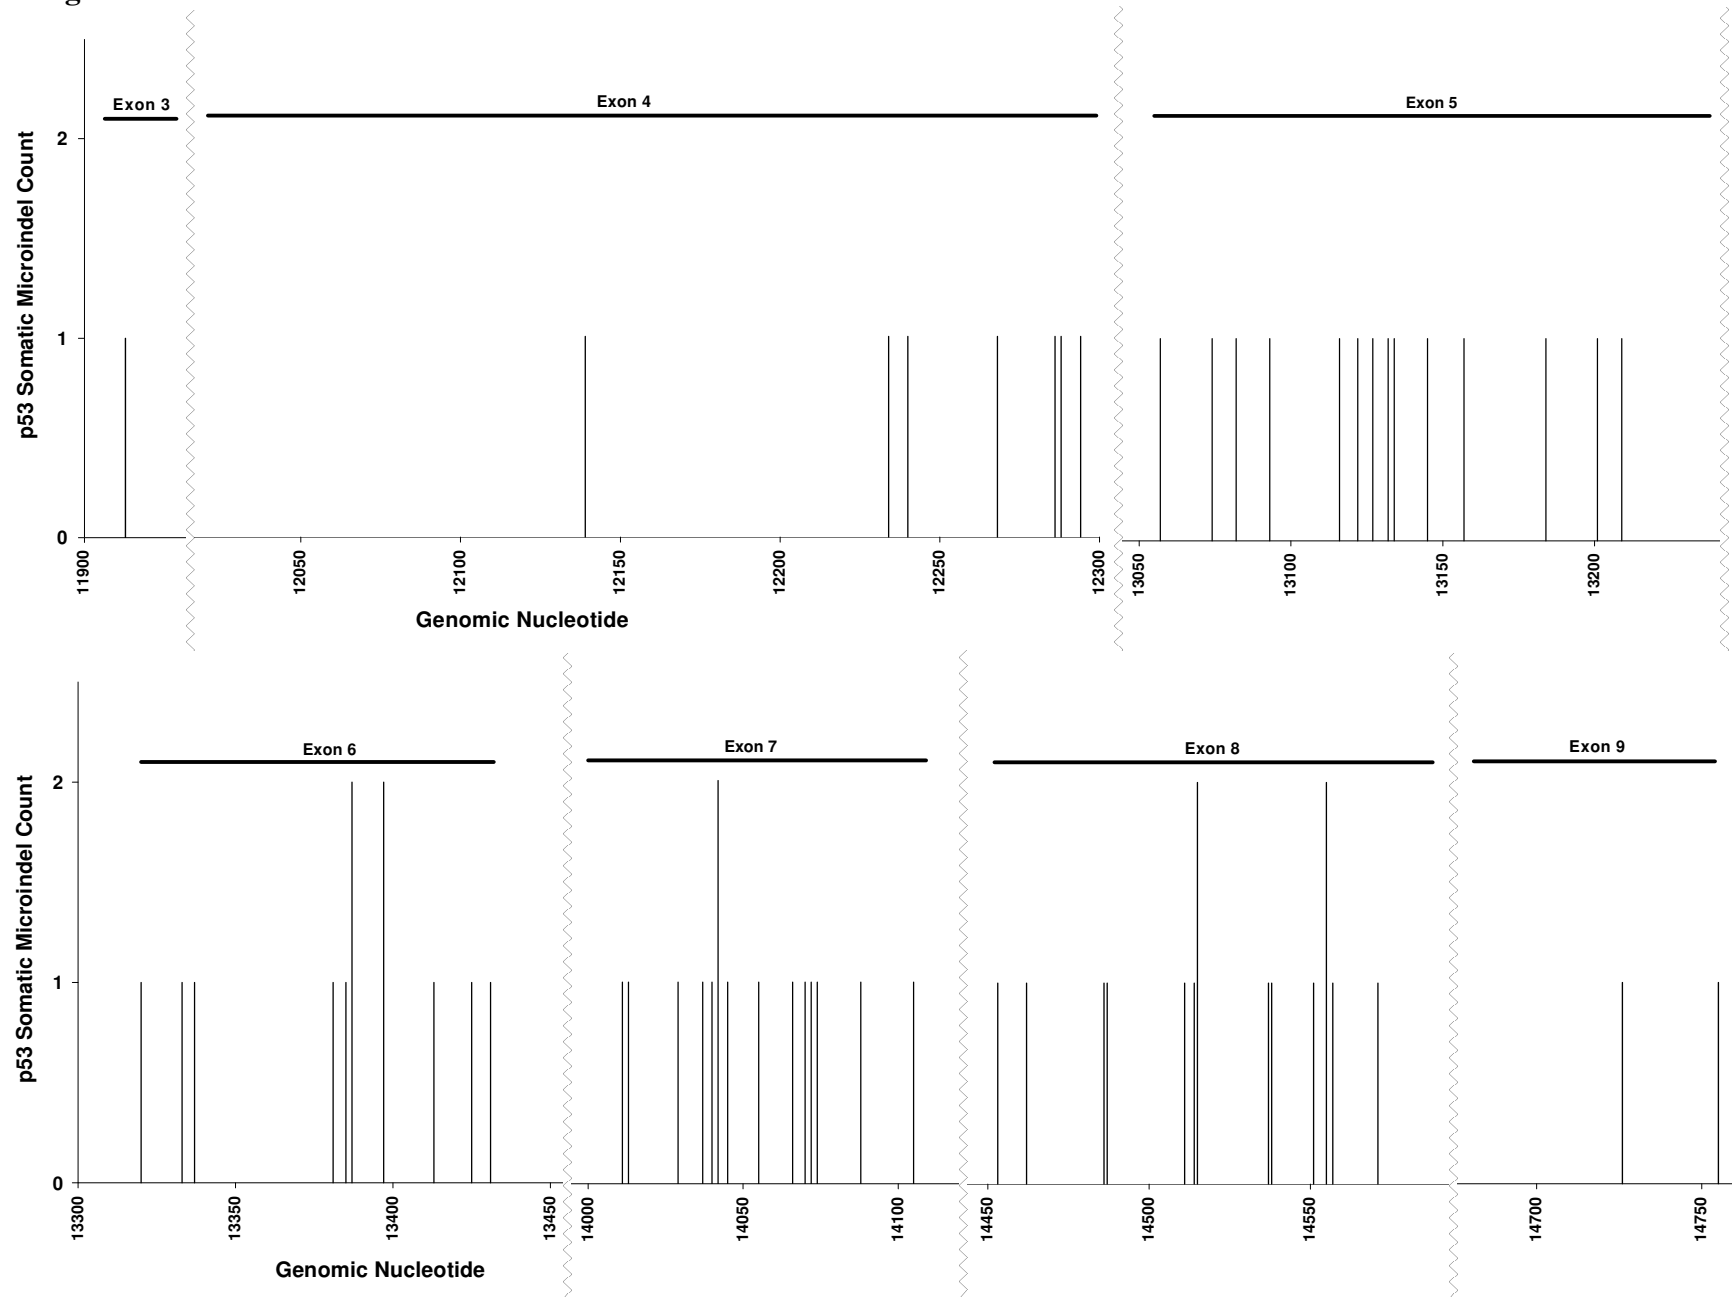

SI Figure 5

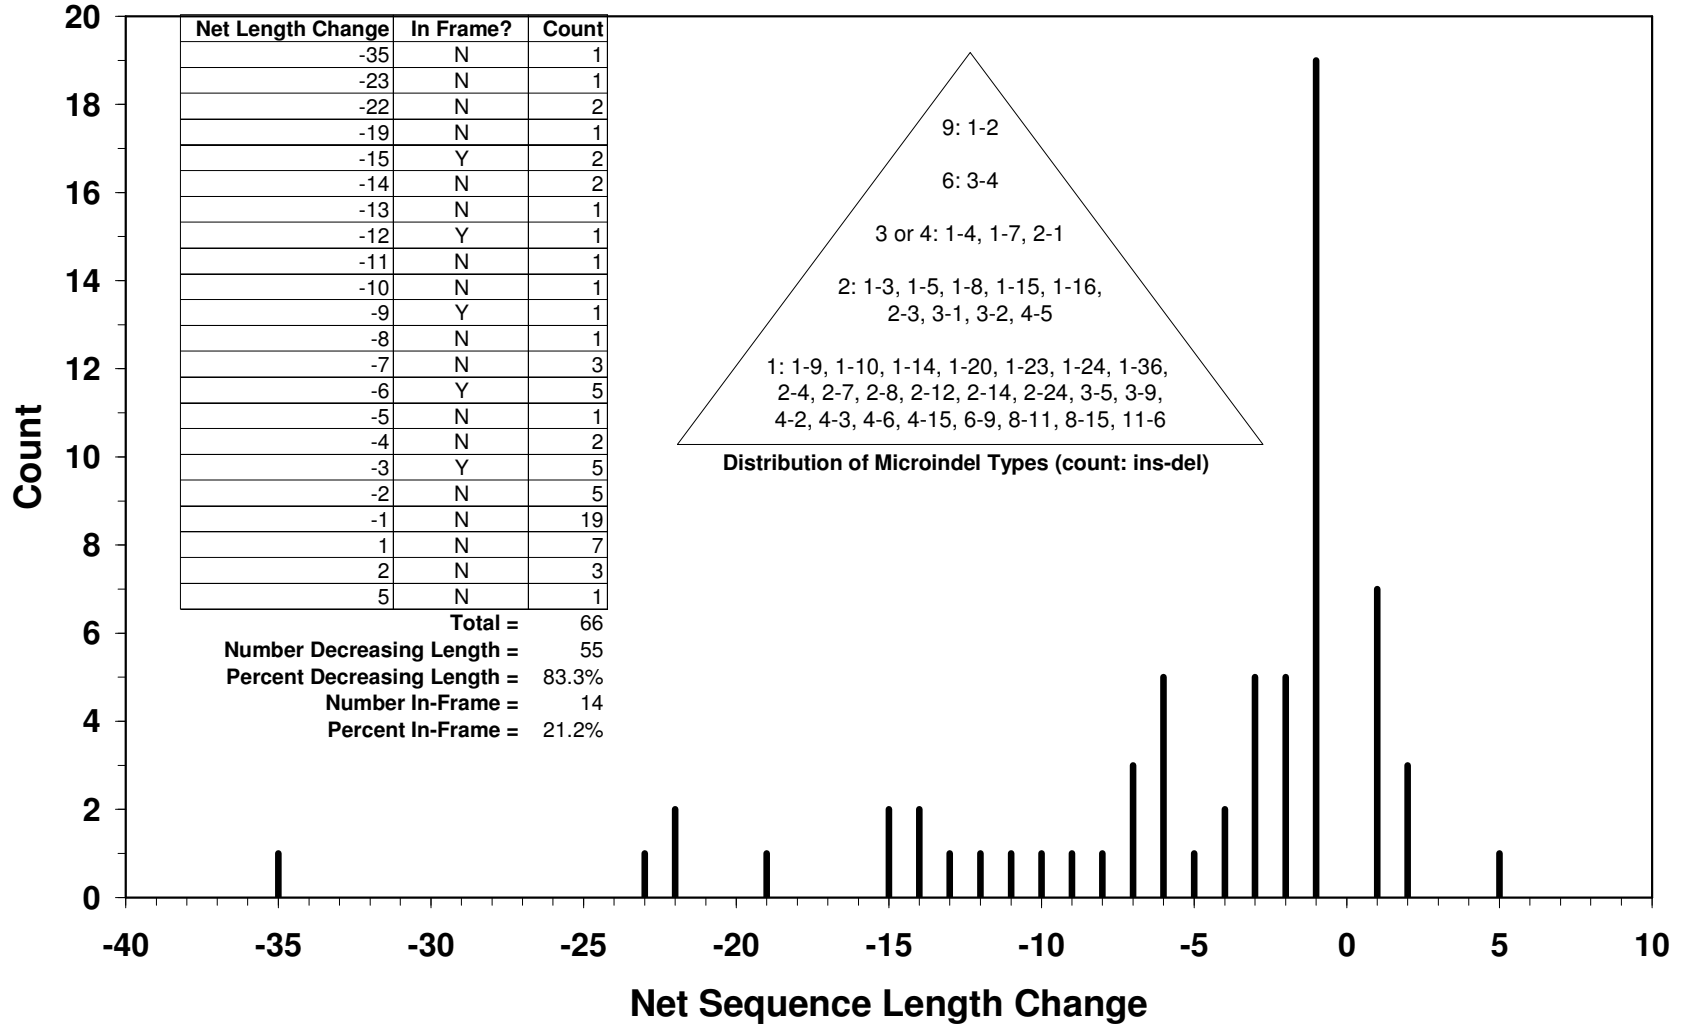

SI Figure 6A

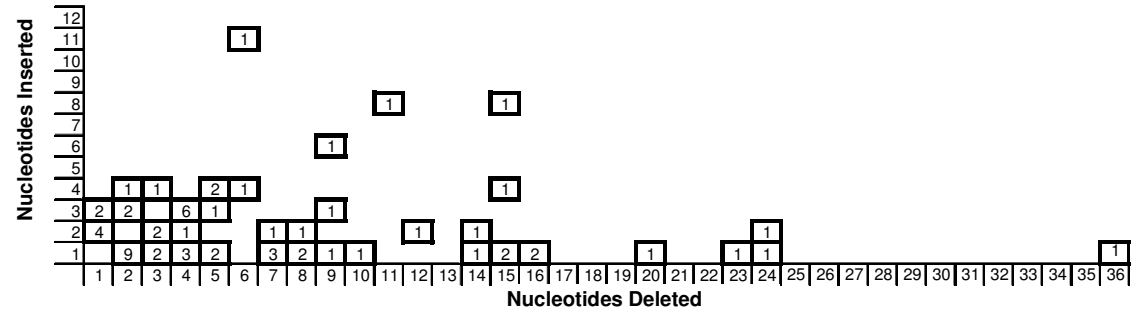

SI Figure 6B

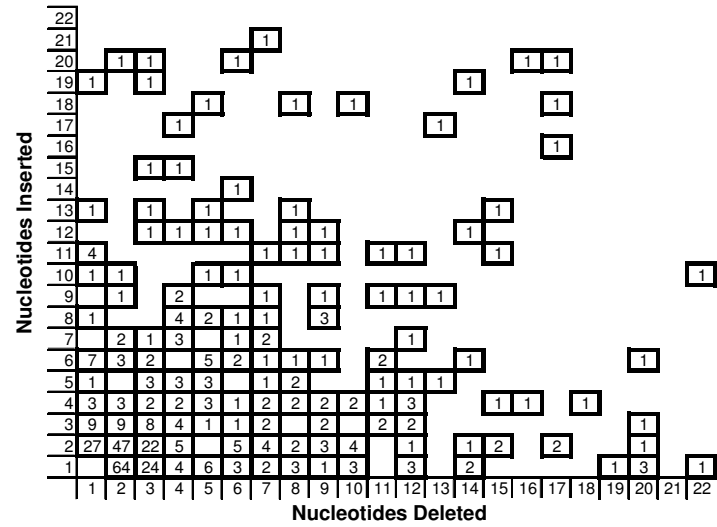

**SI Figure 7A**

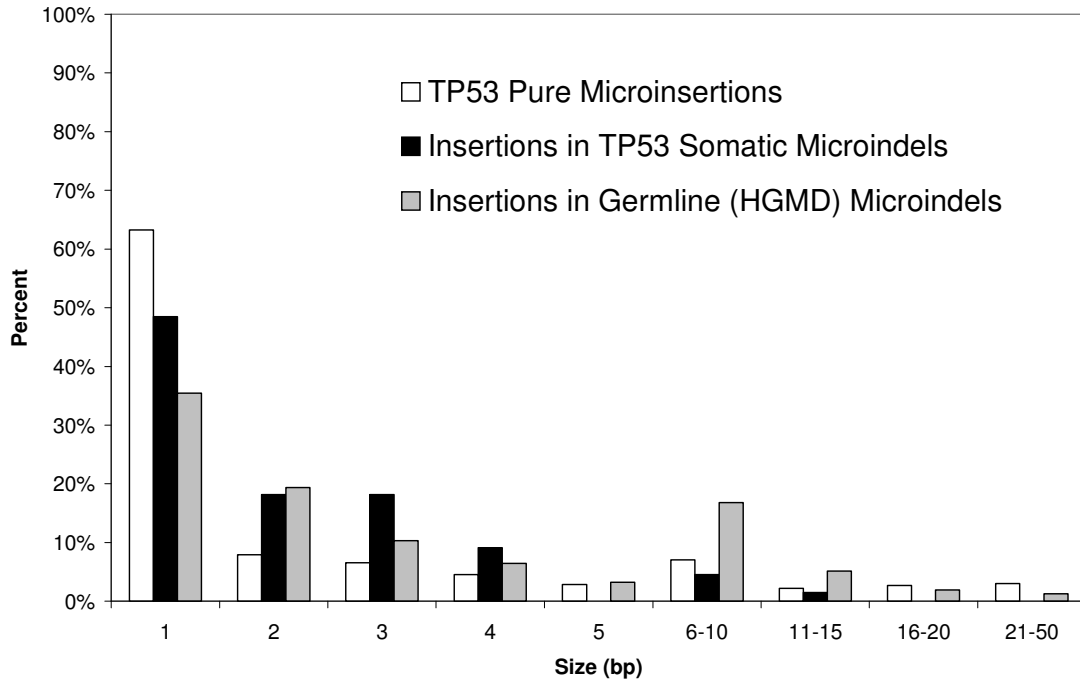

**SI Figure 7B**

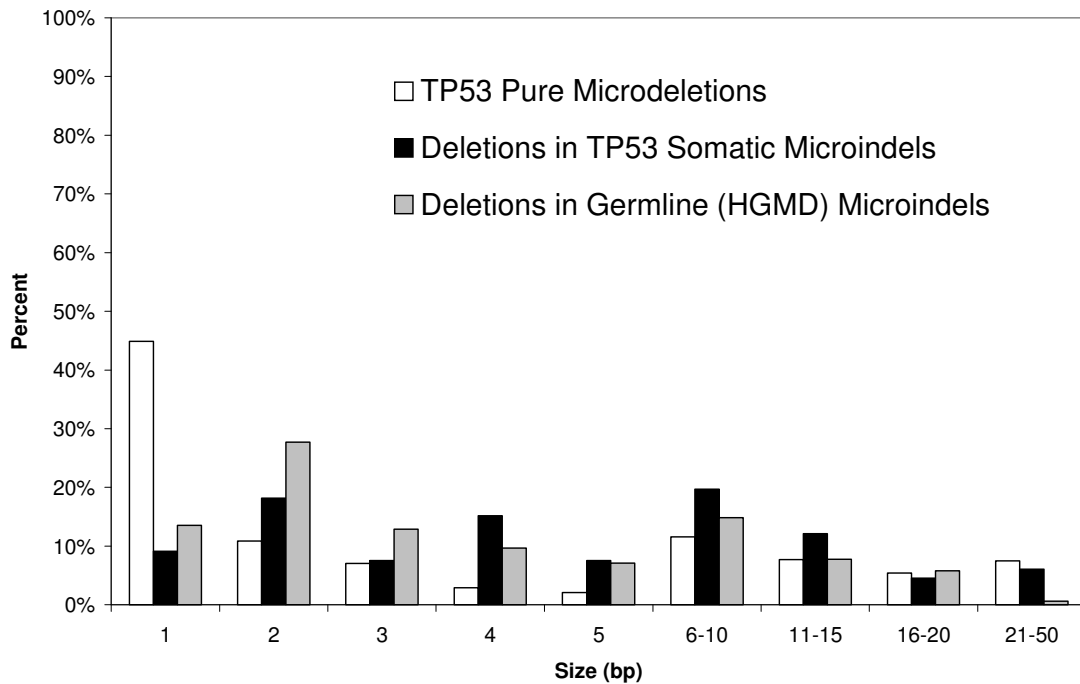

SI Figure 8

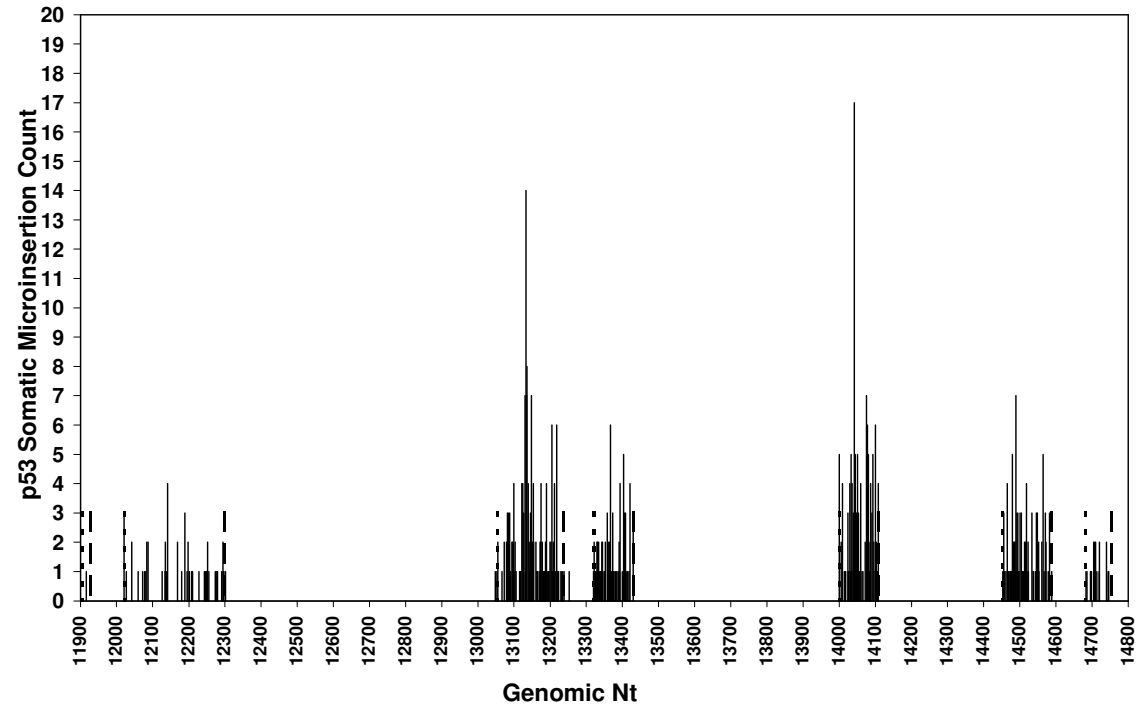

## SI Figure 9 panel A

Step 1: Leading strand synthesis up to the deleted region (in brackets).

```

5' -ACTGATTGCTCTTAGGTCTGGCCCCCTCCTCAG [CATCTTATC] CGAGTGGAAGGAAATTTGCG
                                     \
                                     --
                                     --
5' -ACTGATTGCTCTTAGGTCTGGCCCCCTCCTCAG-->
3' -TGACTAACGAGAATCCAGACCGGGGAGGAGTC [GTAGAATAG] GCTCACCTTCCTTTAAACGC

```

Step 2: Dissociation from leading strand, backward slippage, re-association with leading strand before insertion template at highlighted repeat region (matching bases in bold), and leading strand synthesis through insertion template (underlined) plus one additional base.

```

5' -ACTGATTGCTCTTAGGTCTGGCCCCCTCCTCAG [CATCTTATC] CGAGTGGAAGGAAATTTGCG
                                     \
5' -AGGTCTGGCCCCCTC
                                     --
                                     --
                                     C
                                     TCAGGGCCCCCTC-->
3' -TGACTAACGAGAATCCAGACCGGGGAGAGTC [GTAGAATAG] GCTCACCTTCCTTTAAACGC

```

Step 3: Dissociation from leading strand, forward slippage, re-association with leading strand beyond deleted region at highlighted "repeat" region. At this point, normal synthesis resumes.

```

5' -ACTGATTGCTCTTAGGTCTGGCCCCCTCCTCAG [CATCTTATC] CGAGTGGAAGGAAATTTGCG
                                     \
                                     GCCCCT
                                     /
5' -ACTGATTGCTCTTAGGTCTGGCCCCCTCCTCAG--      -C-->
3' -TGACTAACGAGAATCCAGACCGGGGAGGAGTC [GTAGAATAG] GGCTCACCTTCCTTTAAACGC

```

## SI Figure 9 panel B

Step 1: Lagging strand synthesis up to the deleted region (in brackets).

```

5' -ACTGATTGCTCTTAGGTCTGGCCCCCTCCTCAG [CATCTTATC] CGAGTGGAAGGAAATTTGCG
                                     <--GCTCACCTTCCTTTA-5' \
                                     --
                                     --
3' -TGACTAACGAGAATCCAGACCGGGGAGGAGTC [GTAGAATAG] GCTCACCTTCCTTTAAACGC

```

Step 2: Dissociation from lagging strand, forward slippage, re-association with lagging strand before insertion template at highlighted "repeat" region, and lagging strand synthesis through insertion template (underlined) plus four additional bases. One of these additional bases would have had to be synthesized erroneously as a T (boxed).

```

5' -ACTGATTGCTCTTAGGTCTGGCCCCCTCCCTCAG [CATCTTATC] CGAGTGGAAGGAAATTTGCG
                                     <--AGTCCGGGGAG
                                     C
                                     TCACCTTCCTTTA-5'
3' -TGACTAACGAGAATCCAGACCGGGGAGGAGTC [GTAGAATAG] GCTCACCTTCCTTTAAACGC

```

Step 3: Dissociation from lagging strand, backward slippage, re-association with lagging strand after deleted region at highlighted repeat region. At this point, normal synthesis resumes.

```

5' -ACTGATTGCTCTTAGGTCTGGGCCCCCTCTCAG [CATCTTATC] CGAGTGGAAGGAAATTTGCG
                                     <--AGTC
                                     C
                                     GGGGAGCTCACCTTCCTTTA-5'
3' -TGACTAACGAGAATCCAGACCGGGGAGGAGTC [GTAGAATAG] GCTCACCTTCCTTTAAACGC

```

### SI Figure 9 panel C

Step 1: Leading strand synthesis up through highlighted repeat region (matching bases in bold)..

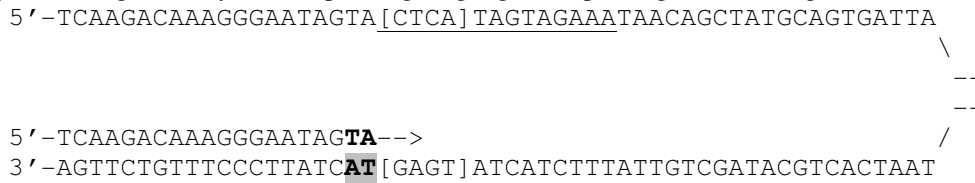

Step 2: Dissociation from leading strand, association with lagging strand before insertion template at highlighted repeat region (matching bases in bold), and lagging strand synthesis through insertion template (underlined) plus two additional bases. Three bases would have had to be synthesized erroneously (boxed).

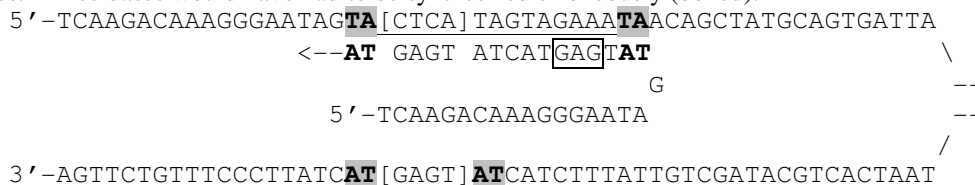

Step 3: Dissociation from lagging strand, re-association with leading strand beyond deleted region at highlighted “repeat” region. At this point, normal synthesis resumes.

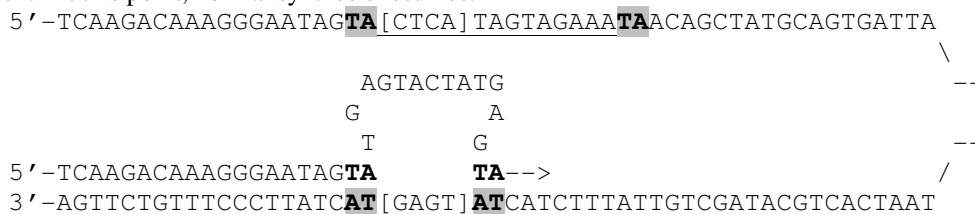

### SI Figure 9 panel D

Step 1: Lagging strand synthesis up through highlighted repeat region (matching bases in bold).

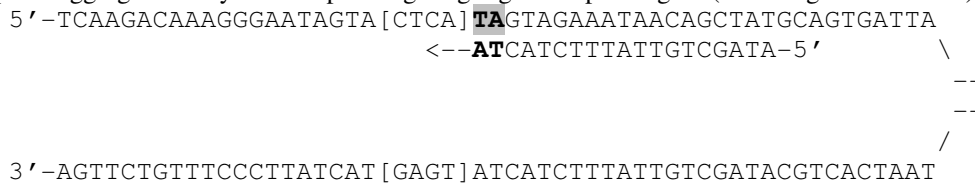

Step 2: Dissociation from lagging strand, association with leading strand before insertion template at highlighted repeat region (matching bases in bold), and leading strand synthesis through insertion template (underlined) plus two additional bases. Three bases would have had to be synthesized erroneously (boxed).

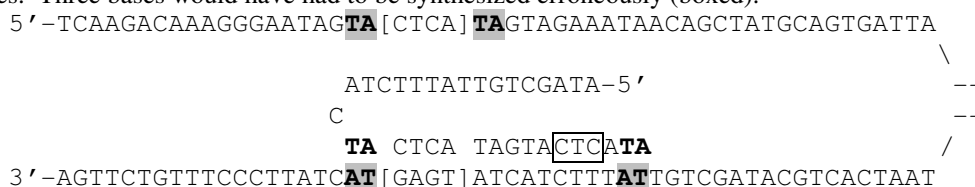

Step 3: Dissociation from leading strand, re-association with lagging strand beyond deleted region at highlighted “repeat” region. At this point, normal synthesis resumes.

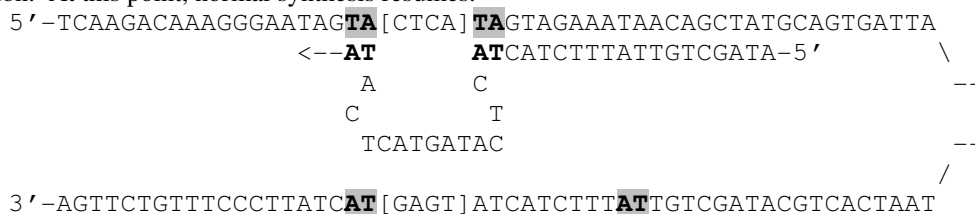

## References for Supplemental Information

1. Halangoda,A., Still,J.G., Hill,K.A., and Sommer,S.S. (2001) Spontaneous microdeletions and microinsertions in a transgenic mouse mutation detection system: analysis of age, tissue, and sequence specificity. *Environ Mol Mutagen*, **37**, 311-323.
2. Ball,E.V., Stenson,P.D., Abeysinghe,S.S., Krawczak,M., Cooper,D.N., and Chuzhanova,N.A. (2005) Microdeletions and microinsertions causing human genetic disease: common mechanisms of mutagenesis and the role of local DNA sequence complexity. *Hum Mutat.*, **26**, 205-213.
3. Ketterling,R.P., Sommer,S.S. (1994) Microdeletions in the factor IX gene: three recurrences associated with a quasipalindromic sequence. *Hum.Molec.Genet.*, **3**, 191-192.
4. Cooper,D.N., Krawczak,M. (1993) *Human Gene Mutation*. Bios Scientific Publishers, Oxford, England.
5. Lieber,M.R., Ma,Y., Pannicke,U., and Schwarz,K. (2003) Mechanism and regulation of human non-homologous DNA end-joining. *Nat Rev Mol Cell Biol*, **4**, 712-720.
6. Honma,M., Sakuraba,M., Koizumi,T., Takashima,Y., Sakamoto,H., and Hayashi,M. (2007) Non-homologous end-joining for repairing I-SceI-induced DNA double strand breaks in human cells. *DNA Repair (Amst)*, **6**, 781-788.
7. Willers,H., Husson,J., Lee,L.W., Hubbe,P., Gazemeier,F., Powell,S.N., and Dahm-Daphi,J. (2006) Distinct mechanisms of nonhomologous end joining in the repair of site-directed chromosomal breaks with noncomplementary and complementary ends. *Radiat.Res*, **166**, 567-574.
8. Moore,J.K., Haber,J.E. (1996) Cell cycle and genetic requirements of two pathways of nonhomologous end-joining repair of double-strand breaks in *Saccharomyces cerevisiae*. *Mol Cell Biol*, **16**, 2164-2173.
9. Aniukwu,J., Glickman,M.S., and Shuman,S. (2008) The pathways and outcomes of mycobacterial NHEJ depend on the structure of the broken DNA ends. *Genes Dev*, **22**, 512-527.
10. Chen,J.M., Chuzhanova,N., Stenson,P.D., Ferec,C., and Cooper,D.N. (2005) Complex gene rearrangements caused by serial replication slippage. *Hum Mutat.*, **26**, 125-134.
11. Chen,J.M., Chuzhanova,N., Stenson,P.D., Ferec,C., and Cooper,D.N. (2005) Intrachromosomal serial replication slippage in trans gives rise to diverse genomic rearrangements involving inversions. *Hum Mutat.*, **26**, 362-373.
